# Supplementary material for: Facile synthesis of porous MgO–CaO–SnOx nanocubes implanted firmly on in situ formed carbon paper and their lithium storage properties
Source: Royal Society of Chemistry journal article supplement (doi:10.1039/c4ta00805g), 2014-01-01
Supplement: c4ta00805g1.pdf [file c4ta00805g1.pdf]

## *Supplementary Information*

### **Facile synthesis of porous MgO-CaO-SnO<sub>x</sub> nanocubes implanted firmly on in-situ formed carbon paper and their lithium storage properties**

Bote Zhao,<sup>ab</sup> Guangming Yang,<sup>ab</sup> Ran Ran,<sup>ab</sup> Chan Kwak,<sup>\*c</sup> Doh Won Jung,<sup>c</sup> Hee Jung Park<sup>c</sup> and Zongping Shao<sup>\*ad</sup>

<sup>a</sup> State Key Laboratory of Materials-Oriented Chemical Engineering, Nanjing University of Technology, Nanjing 210009, China.

<sup>b</sup> College of Chemistry & Chemical Engineering, Nanjing University of Technology, Nanjing 210009, China

<sup>c</sup> Samsung Advanced Institute of Technology (SAIT), 14-1 Nongseo-dong, Yongin-si, Gyunggi-do, Korea 446-712.

<sup>d</sup> College of Energy, Nanjing University of Technology, Nanjing 210009, China

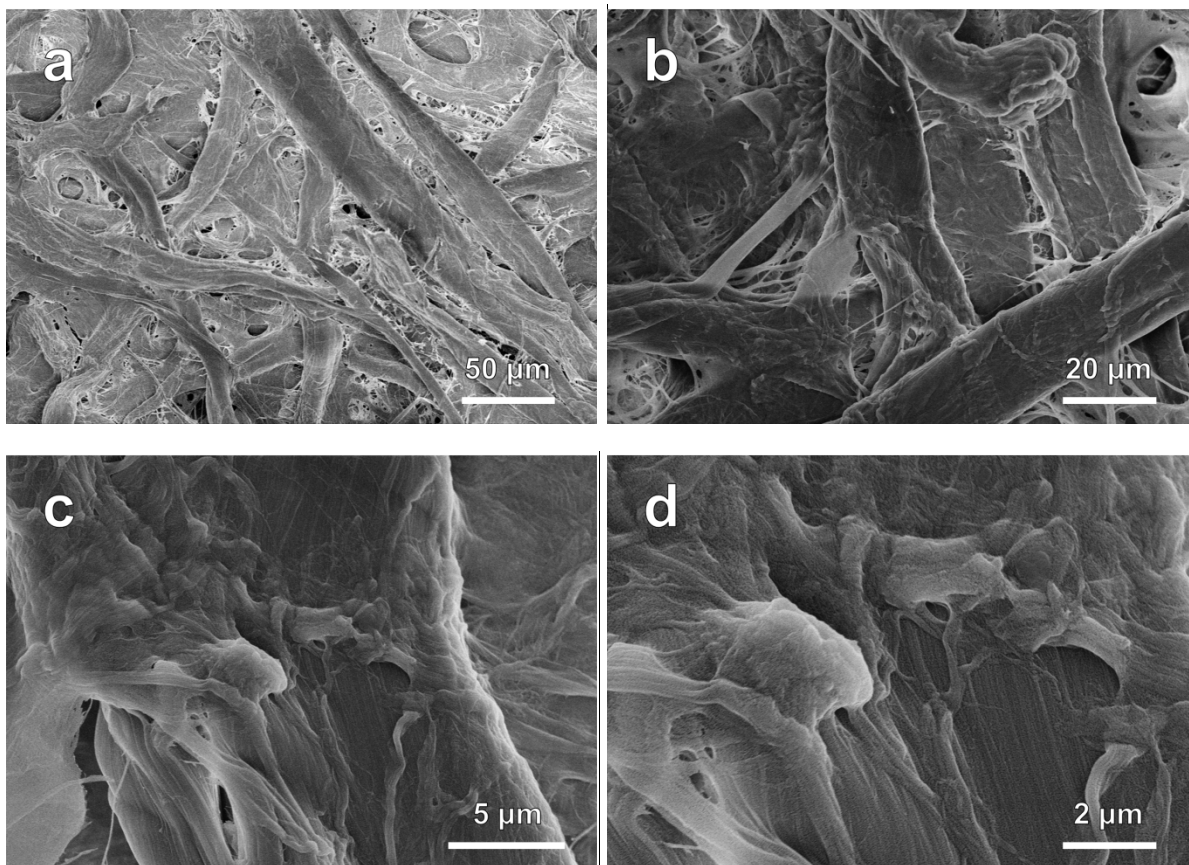

**Figure S1.** (a-d) FE-SEM images of acid activated filter paper.

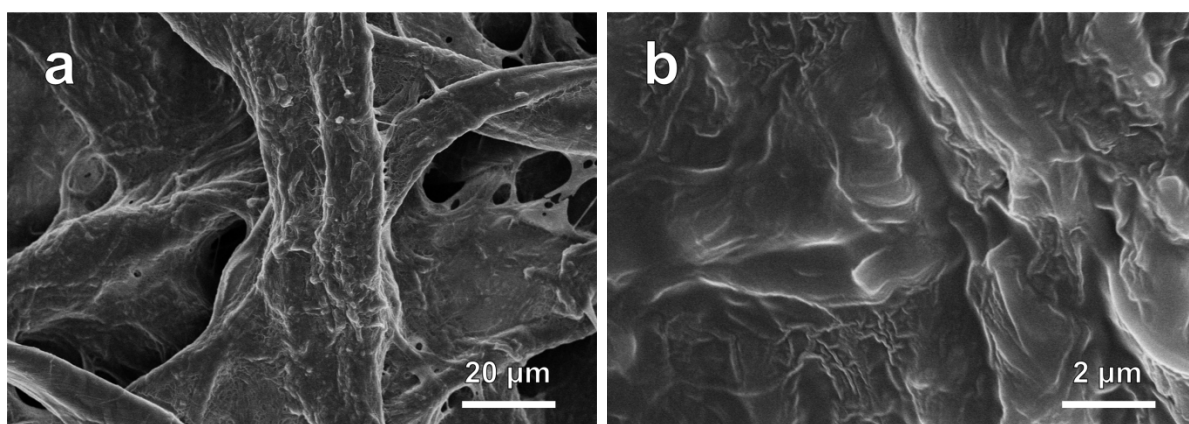

**Figure S2.** (a, b) FE-SEM images of filter paper after adsorption of tin(II) octanoate.

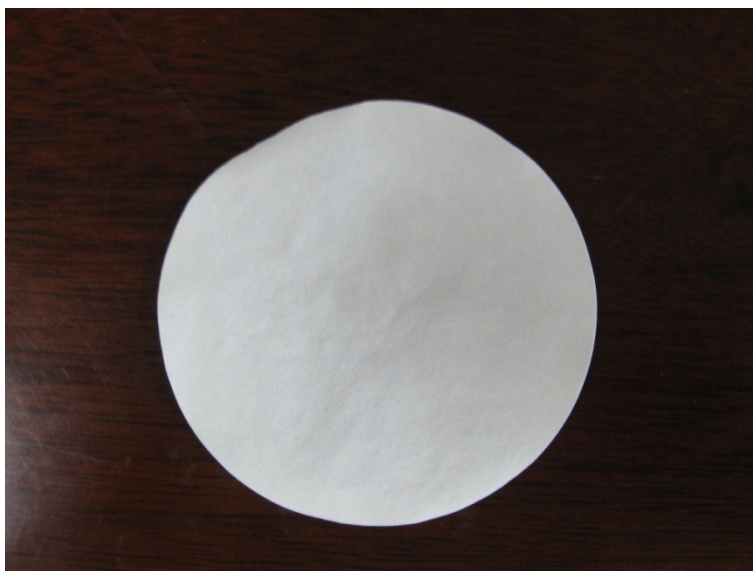

**Figure S3.** Digital photo of precursor cubes/filter paper by treating the absorbed composite paper in boiling  $\text{Mg}^{2+}/\text{Ca}^{2+}$ -containing water (300 mL) with 1 mL of  $\text{NH}_3 \cdot \text{H}_2\text{O}$  for 1 h.

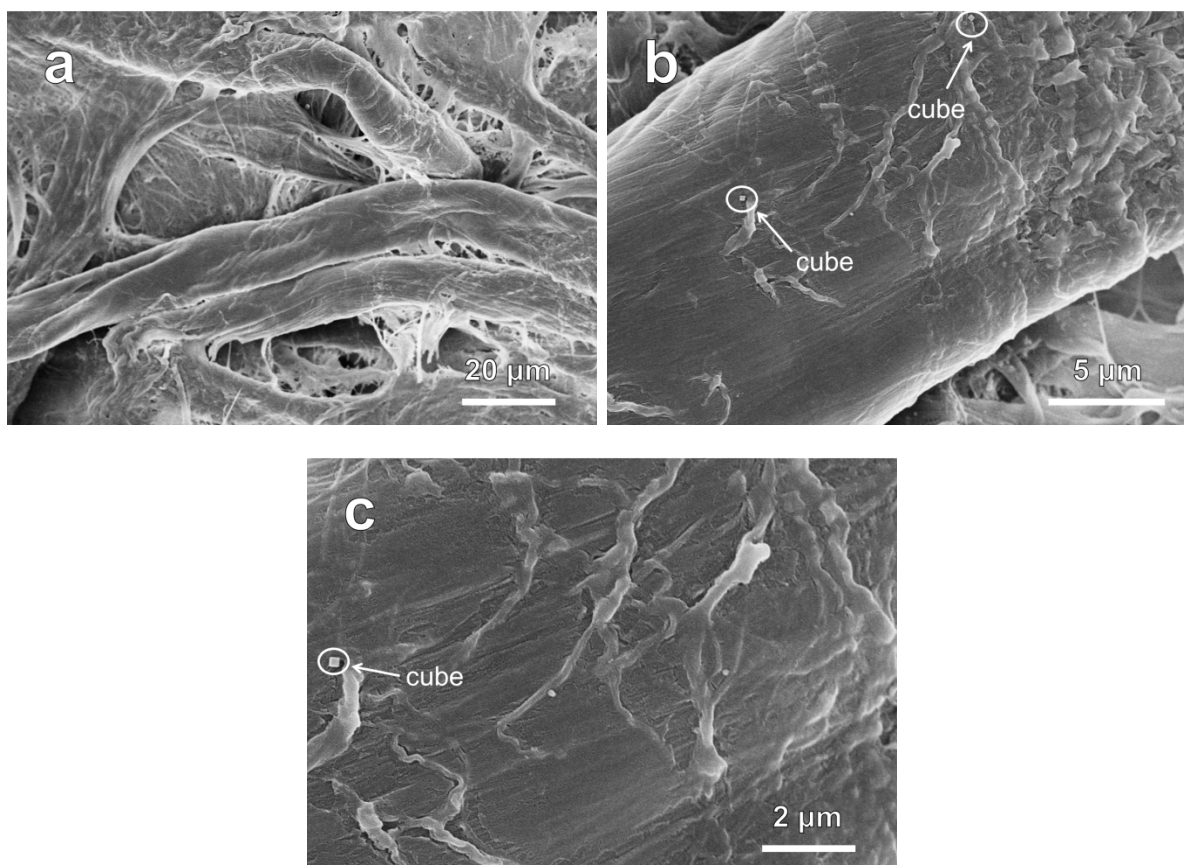

**Figure S4.** (a-c) FE-SEM images of composite paper after treating the absorbed composite paper in boiling deionized water (300 mL) with 1 mL of  $\text{NH}_3 \cdot \text{H}_2\text{O}$  for 1 h.

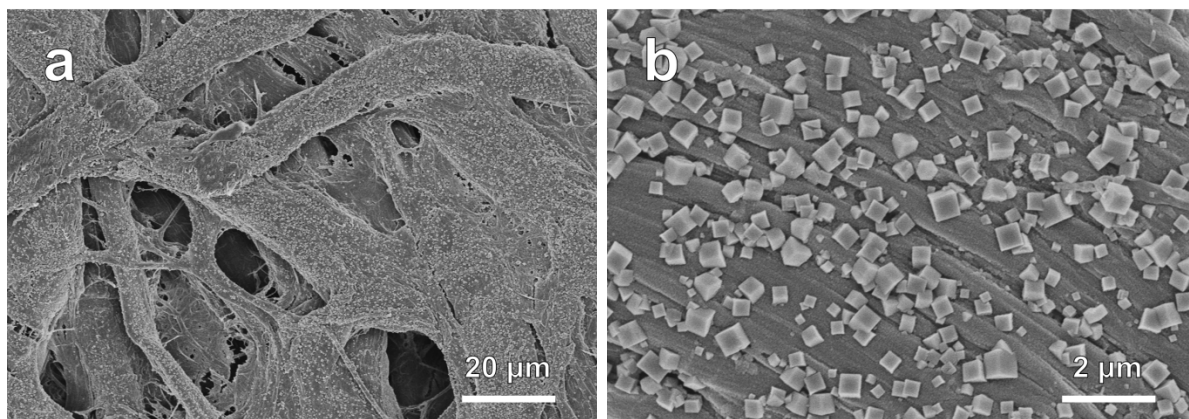

**Figure S5.** (a, b) FE-SEM images of composite paper after treating the absorbed composite paper in boiling  $\text{Mg}^{2+}$ -containing water ( $7.7 \text{ mg L}^{-1}$ , 300 mL) with 1 mL of  $\text{NH}_3 \cdot \text{H}_2\text{O}$  for 1 h.

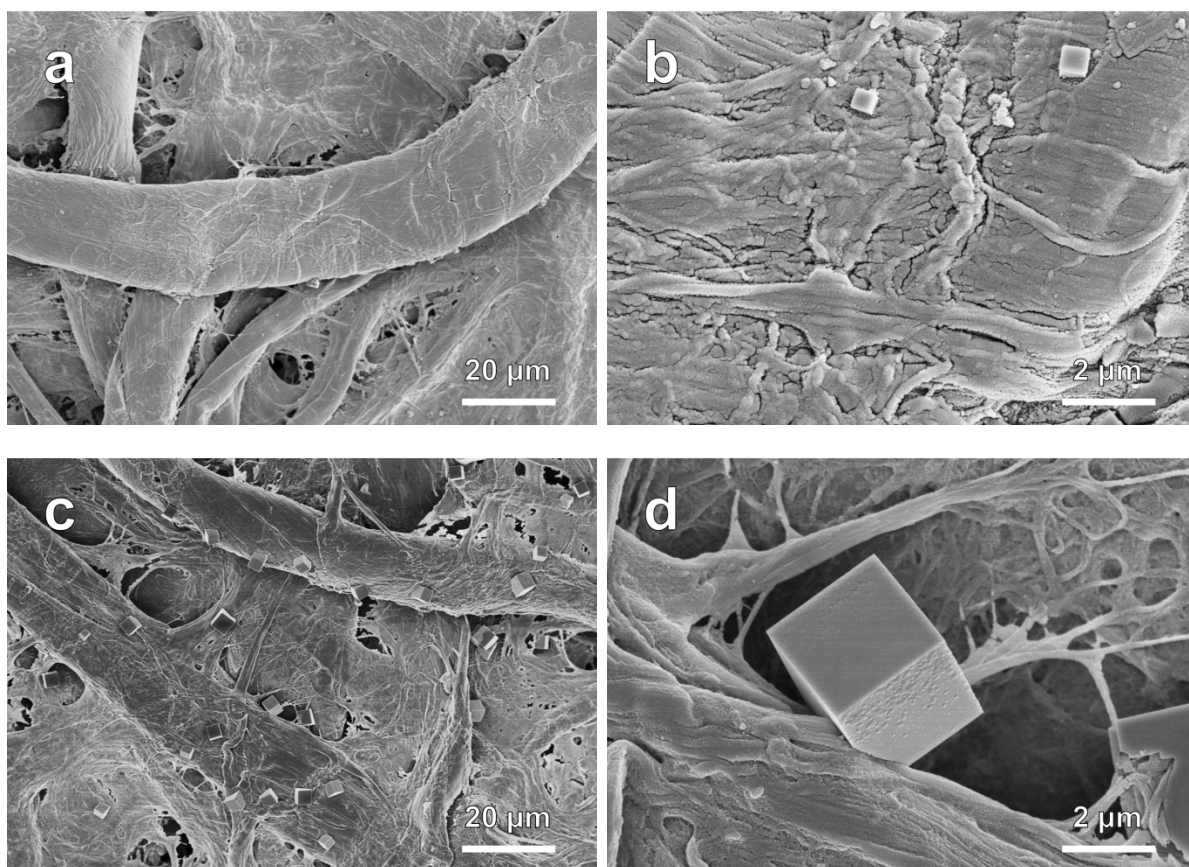

**Figure S6.** FE-SEM images of composite papers after treating the absorbed composite papers in boiling  $\text{Ca}^{2+}$ -containing water (300 mL) with 1 mL of  $\text{NH}_3 \cdot \text{H}_2\text{O}$  for 1 h with  $\text{Ca}^{2+}$  concentration of (a, b)  $12.7 \text{ mg L}^{-1}$  (0.095 mmol) and (c, d)  $39.6 \text{ mg L}^{-1}$  (0.296 mmol).



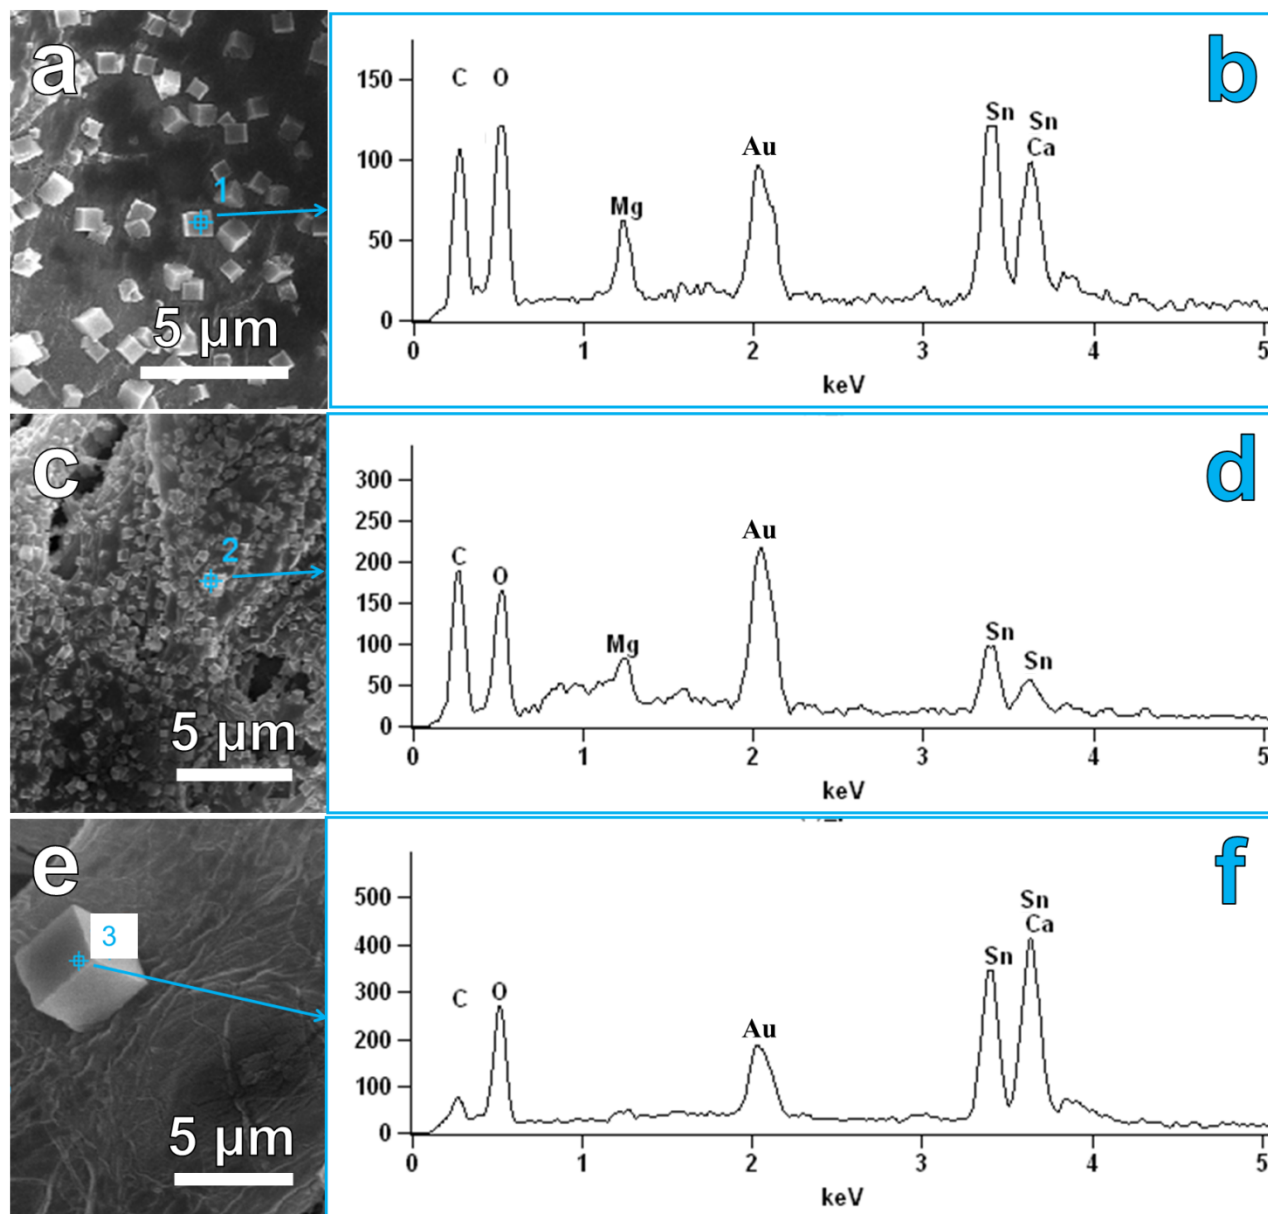

**Figure S7.** FE-SEM images of composite papers after treating the absorbed composite papers in boiling (a)  $\text{Mg}^{2+}/\text{Ca}^{2+}$ -containing water (300 mL,  $7.7 \text{ mg L}^{-1}$  of  $\text{Mg}^{2+}$  and  $39.6 \text{ mg L}^{-1}$  of  $\text{Ca}^{2+}$ ) with 1 mL of  $\text{NH}_3 \cdot \text{H}_2\text{O}$  for 1 h, (c)  $\text{Mg}^{2+}$ -containing water (300 mL,  $7.7 \text{ mg L}^{-1}$  of  $\text{Mg}^{2+}$ ) with 1 mL of  $\text{NH}_3 \cdot \text{H}_2\text{O}$  for 1 h, (e)  $\text{Ca}^{2+}$ -containing water (300 mL,  $39.6 \text{ mg L}^{-1}$  of  $\text{Ca}^{2+}$ ) with 1 mL of  $\text{NH}_3 \cdot \text{H}_2\text{O}$  for 1 h; (b, d, f) EDX spectra from “1”, “2”, “3” sites in Figure S7a, Figure S7c, Figure S7e, respectively. The signal of Au is generated from the surface coating by sputtering to minimize charging effects under FE-SEM imaging conditions.

**Table S1.** The elemental composition of site at cube from EDX spectrum in Figure S7.

| Element | “1” site (Fig. S7a&b.) |         | “2” site (Fig. S7c&d.) |         | “3” site (Fig. S7e&f.) |         |
|---------|------------------------|---------|------------------------|---------|------------------------|---------|
|         | Norm.                  | Atom.   | Norm.                  | Atom.   | Norm.                  | Atom.   |
|         | content                | content | content                | content | content                | content |
|         | [wt.%]                 | [at.%]  | [wt.%]                 | [at.%]  | [wt.%]                 | [at.%]  |
| C-K     | 44.67                  | 58.20   | 53.26                  | 64.05   | 17.83                  | 31.23   |
| O-K     | 39.29                  | 38.43   | 37.84                  | 34.17   | 45.47                  | 59.79   |
| Mg-K    | 2.10                   | 1.35    | 1.47                   | 0.87    | -                      | -       |
| Ca-K    | 0.70                   | 0.27    | -                      | -       | 7.11                   | 3.73    |
| Sn-L    | 13.24                  | 1.75    | 7.43                   | 0.90    | 29.60                  | 5.25    |

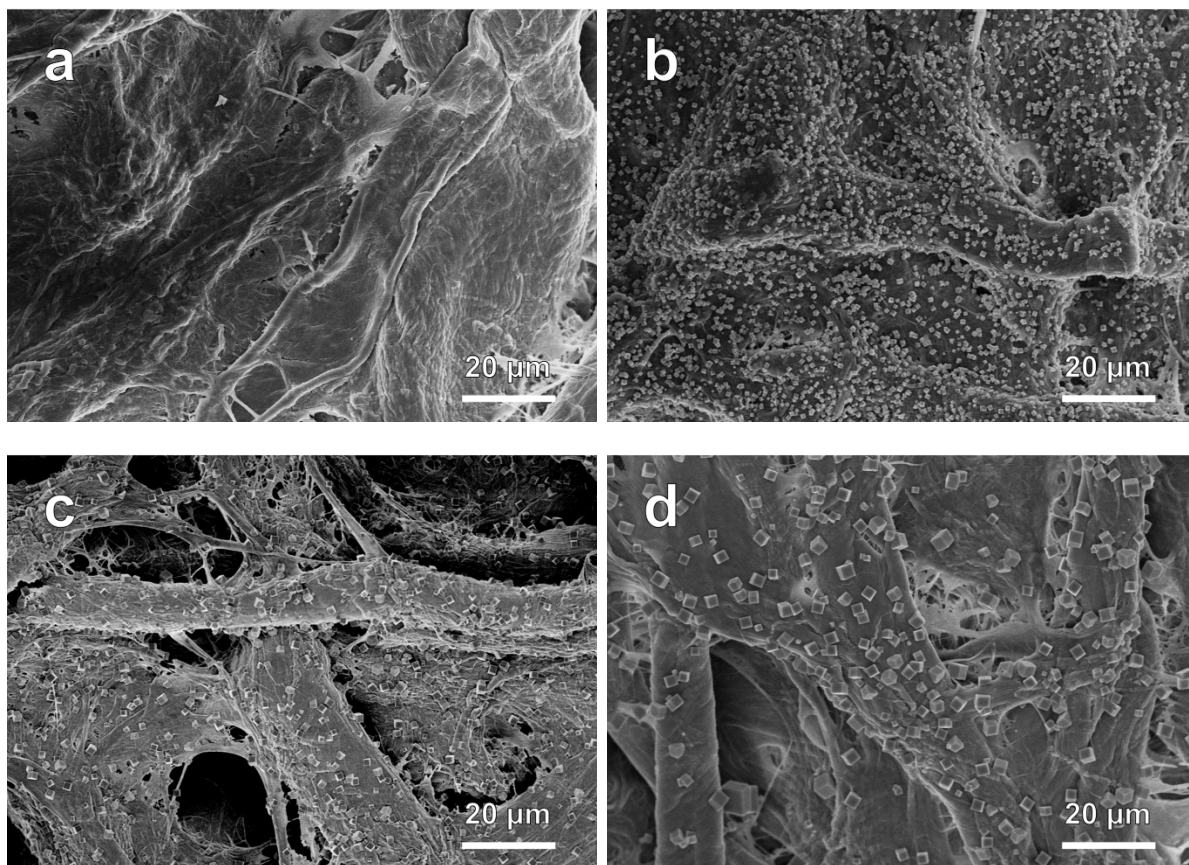

**Figure S8.** Representative FE-SEM images of composite paper after treating the absorbed composite paper in boiling  $\text{Mg}^{2+}/\text{Ca}^{2+}$ -containing water (300 mL) with different amounts of  $\text{NH}_3 \cdot \text{H}_2\text{O}$  for 1 h: (a) 0 mL; (b) 1 mL; (c) 3 mL; and (d) 5 mL.

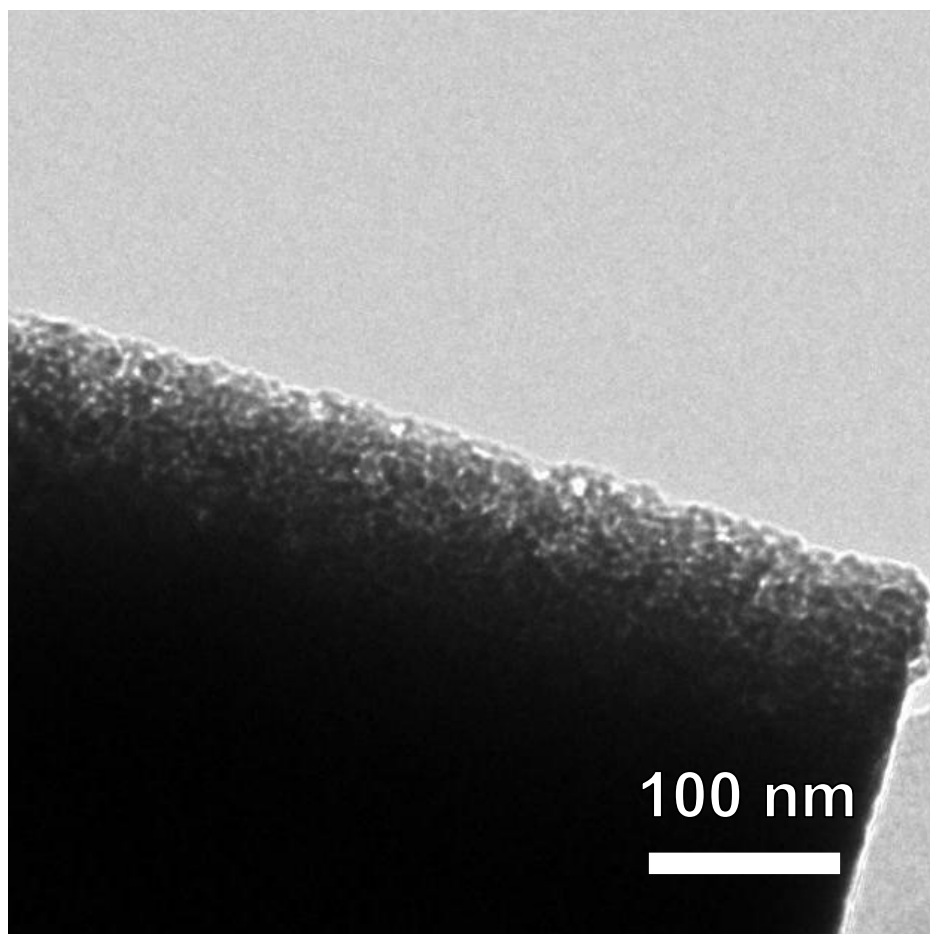

**Figure S9.** TEM image of the edge of MgO-CaO-SnO<sub>x</sub> cube calcined at 600 °C for 3 h.



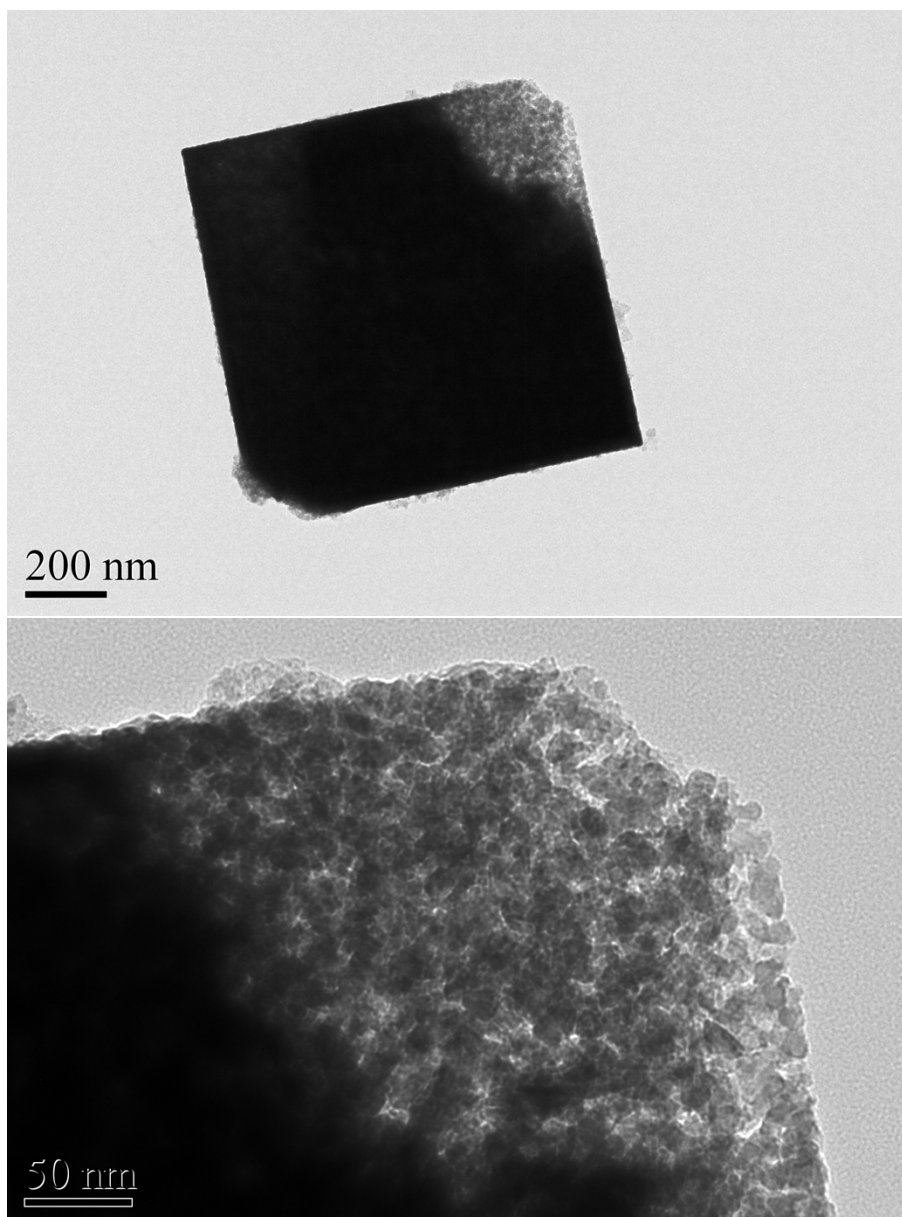

**Figure S10.** TEM images of a broken MgO-CaO-SnO<sub>x</sub> cube calcined at 700 °C for 1 h.

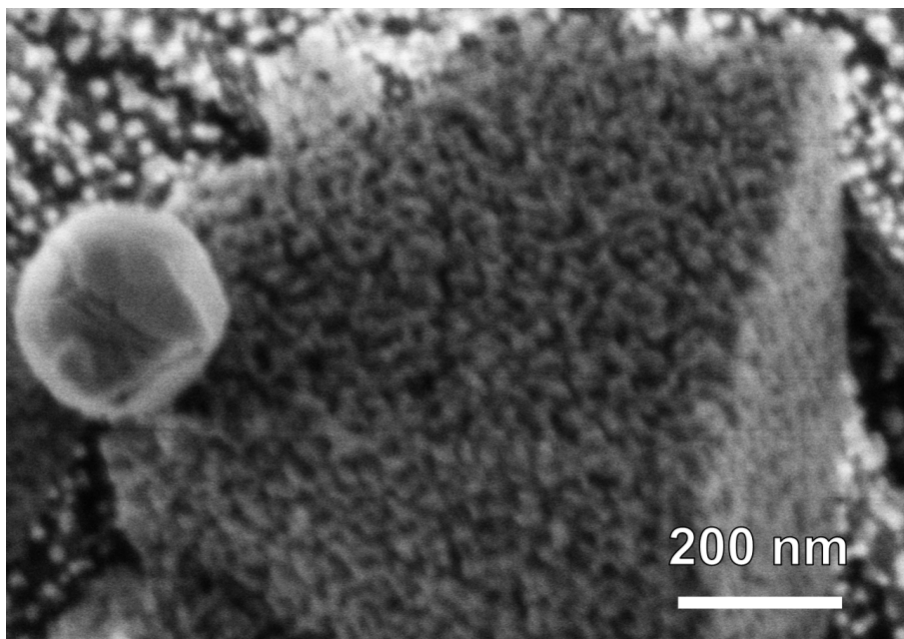

**Figure S11.** A magnified FE-SEM image of MgO-CaO-SnO<sub>x</sub>-cube/carbon paper calcined at 800 °C for 1 h.

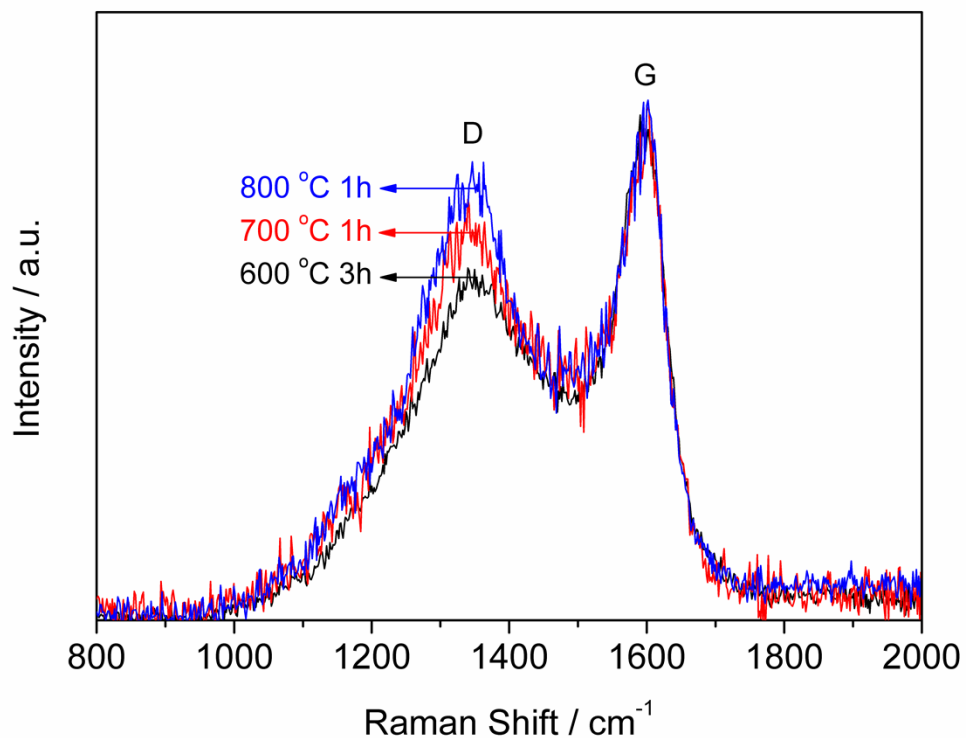

**Figure S12.** Raman spectra of MgO-CaO-SnO<sub>x</sub>/carbon paper obtained at 600 °C for 3 h, 700 °C for 1 h, and 800 °C for 1 h, respectively. The Raman intensity of sample obtained at 600 °C for 3 h is multiplied by a factor of 0.22. The G band could be adjusted to coincide, and then the graphitization degree of all samples could be clearly distinguished.

The samples were also studied using Raman measurement. The results from the Raman spectra indicated that the graphitization degree decreased as the calcination temperature increased. This was different from the common understanding that the higher temperature for carbon lead to higher graphitization degree. It may be caused by the reaction between carbon and SnO<sub>x</sub>, which resulted in formation of more disordered carbon.

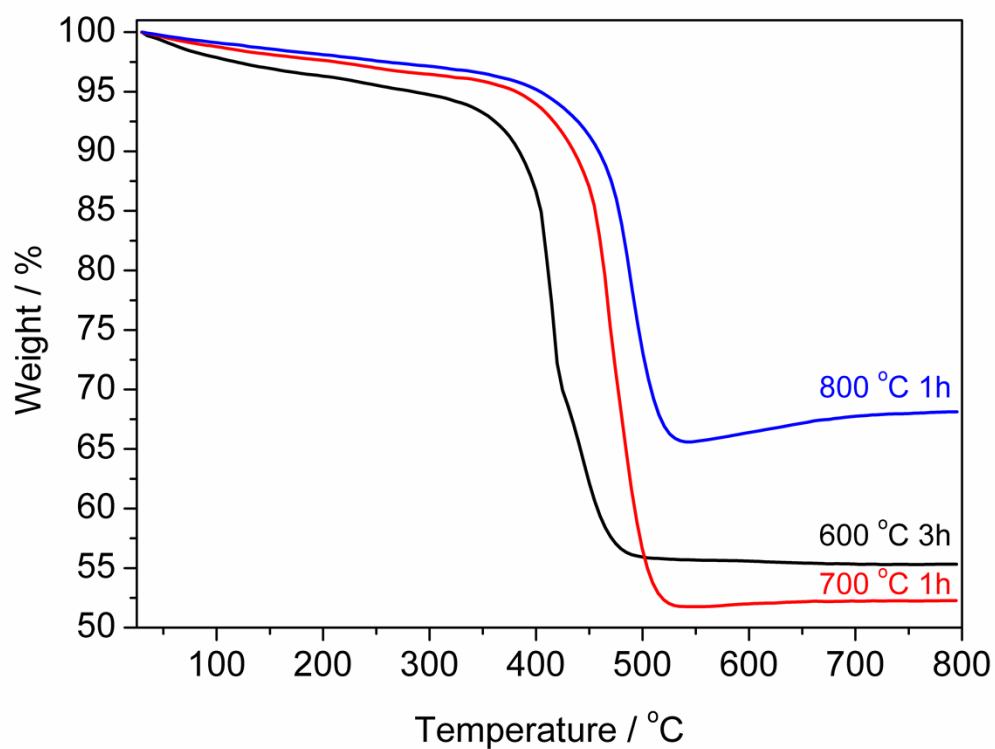

**Figure S13.** Thermogravimetric analysis (TGA) of MgO-CaO-SnO<sub>x</sub>/carbon paper obtained at 600 °C for 3 h, 700 °C for 1 h, and 800 °C for 1 h, respectively.



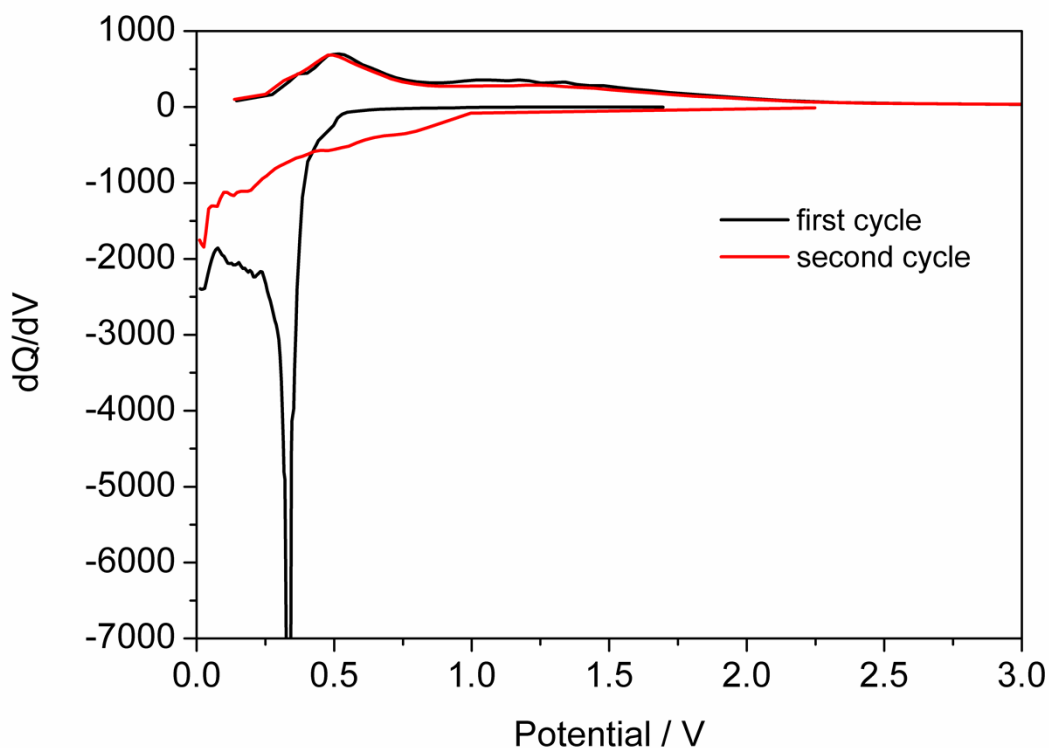

**Figure S14.** Corresponding differential capacity plots of the MgO-CaO-SnO<sub>x</sub>-nanocubes/carbon paper electrode obtained at 600 °C for 3 h at 100 mA g<sup>-1</sup> in the potential range of 0.01–3.0 V.

Shown in Figure S14, a cathodic peak appeared at round 0.33 V in the first cycle and disappeared in the second cycle, which could be attributed to the conversion of SnO<sub>x</sub> to Sn and the formation of solid–electrolyte interface (SEI) layer. There was characteristic pair of cathodic and anodic peaks at round 0.15 V and 0.50 V in the both first and second cycles, which was related to reversible alloying and de-alloying processes, respectively.

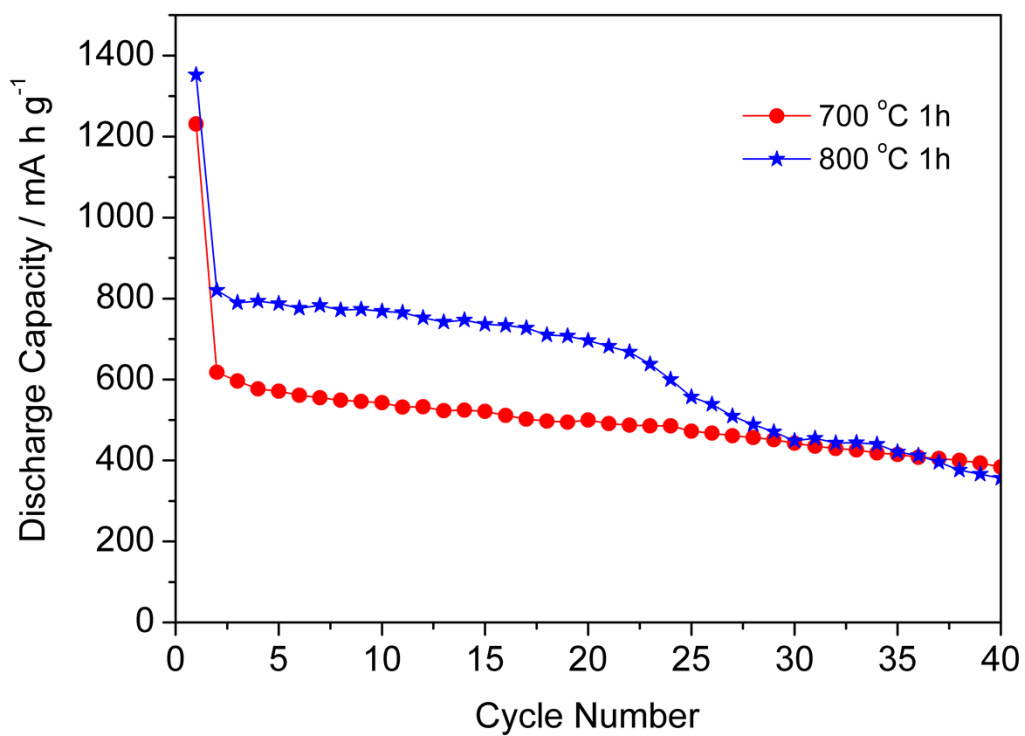

**Figure S15.** Cycling performance of the cells with  $\text{MgO-CaO-SnO}_x$ -nanocubes/carbon paper electrodes obtained at 700 °C for 1 h and 800 °C for 1 h at  $100 \text{ mA g}^{-1}$  in the potential range of 0.01–3.0 V.
